# Supplementary material
Source: PubMed Central journal article supplement (PMC6086197)
Supplement: tpmd170679.SD1.pdf [file tpmd170679.SD1.pdf]

SUPPLEMENTAL TABLE 1  
Alphavirus and flavivirus horses' hemagglutination antibodies titers.

| CHARACTERISTICS |          |           | HEMAGGLUTINATION INHIBITION TEST |        |        |            |        |         |
|-----------------|----------|-----------|----------------------------------|--------|--------|------------|--------|---------|
| Nº Sera         | Province | Distric   | ALPHA VIRUS                      |        |        | FLAVIVIRUS |        |         |
|                 |          |           | WEE                              | VEE    | EEE    | ILH        | SLE    | WN      |
| 1               | Darien   | Darien    | 0                                | 1:160  | 1:40   | 1:80       | 1:640  | 1:160   |
| 2               | Darien   | chepigana | 0                                | 0      | 1:160  | 0          | 1:40   | 0       |
| 3               | Cocle    | Cocle     | 0                                | 1:40   | 0      | 1:160      | 1:320  | 1:320   |
| 4               | Cocle    | Cocle     | 0                                | 0      | 0      | 1:320      | 1:640  | 1:2560  |
| 5               | Darien   | Pinogana  | 0                                | 0      | 1:1280 | 1:80       | 1:320  | 160     |
| 6               | Panama   | Chepo     | 0                                | 0      | 1:1280 | 0          | 1:80   | 0       |
| 7               | Panama   | Chepo     | 0                                | 0      | 0      | 0          | 0      | 0       |
| 8               | Panama   | Chepo     | 0                                | 0      | 0      | 0          | 0      | 0       |
| 9               | Darien   | Meteti    | 0                                | 1:160  | 1:160  | 1:80       | 1:640  | 1:320   |
| 10              | Panama   | Chepo     | 0                                | 0      | 1:640  | 0          | 1:40   | 1:80    |
| 11              | Darien   | Santa Fe  | 0                                | 0      | 1:1280 | 1:20       | 1:160  | 1:40    |
| 12              | Darien   | Pinogana  | 0                                | 0      | 1:1280 | 0          | 0      | 0       |
| 13              | Panama   | Chepo     | 0                                | 0      | 1:640  | 1:40       | 0      | 0       |
| 14              | Darien   | Chepigana | 0                                | 0      | 1:80   | 1:80       | 1:320  | 160     |
| 15              | Darien   | Darien    | 0                                | 1:20   | 1:1280 | 0          | 0      | 0       |
| 16              | Darien   | Darien    | 0                                | 0      | 1:1280 | 0          | 0      | 0       |
| 17              | Panama   | Chepo     | 0                                | 0      | 0      | 1:20       | 1:40   | 1:320   |
| 18              | Darien   | Chepigana | 0                                | 0      | 0      | 0          | 1:80   | 0       |
| 19              | Darien   | Chepigana | 1:40                             | 1:160  | 1:40   | 1:160      | 1:640  | 1:320   |
| 20              | Darien   | Chepigana | 0                                | 0      | 0      | 0          | 1:40   | 0       |
| 21              | Darien   | Chepigana | 1:40                             | 0      | 1:320  | 0          | 1:40   | 0       |
| 22              | Darien   | Chepigana | 1:20                             | 1:20   | 1:80   | 1:160      | 1:320  | 1:320   |
| 23              | Darien   | pinogana  | 1:320                            | 1:1280 | 1:1280 | 1:80       | 1:320  | 1:320   |
| 24              | Panama   | Chepo     | 0                                | 1:20   | 1:1280 | 0          | 0      | 0       |
| 25              | Panama   | Chepo     | 0                                | 0      | 0      | 0          | 0      | 0       |
| 26              | Panama   | Chepo     | 0                                | 0      | 0      | 0          | 0      | 0       |
| 27              | Darien   | Chepigana | 0                                | 0      | 1:320  | 0          | 0      | 0       |
| 28              | Darien   | Chepigana | 0                                | 1:80   | 0      | 0          | 0      | 0       |
| 29              | Darien   | Chepigana | 1:160                            | 1:1280 | 1:320  | 0          | 0      | 0       |
| 30              | Darien   | Chepigana | 0                                | 0      | 0      | 0          | 1:40   | 0       |
| 31              | Darien   | Chepigana | 0                                | 0      | 1:320  | 0          | 0      | 0       |
| 32              | Darien   | Chepigana | 1:20                             | 1:80   | 1:320  | 1:40       | 1:160  | 1:160   |
| 33              | Darien   | Chepigana | 1:80                             | 1:320  | 1:160  | 1:80       | 1:160  | 1:160   |
| 34              | Darien   | Chepigana | 1:160                            | 1:1280 | 1:320  | 1:80       | 1:320  | 1:80    |
| 35              | Darien   | Chepigana | 1:160                            | 1:1280 | 1:320  | 1:80       | 1:320  | 1:80    |
| 36              | Darien   | Chepigana | 1:80                             | 1:160  | 1:160  | 1:20       | 1:640  | 1:40    |
| 37              | Darien   | Darien    | 1:40                             | 1:640  | 1:160  | 1:320      | 1:1280 | 1:320   |
| 38              | Darien   | Darien    | 1:20                             | 1:640  | 1:160  | 1:40       | 1:80   | 1:40    |
| 39              | Darien   | Chepigana | 1:20                             | 1:640  | 1:40   | 0          | 1:40   | 0       |
| 40              | Darien   | Chepigana | 0                                | 0      | 1:20   | 1:20       | 1:80   | 0       |
| 41              | Darien   | Chepigana | 0                                | 0      | 0      | 0          | 0      | 0       |
| 42              | Darien   | Chepigana | 0                                | 0      | 0      | 0          | 0      | 0       |
| 43              | Darien   | Pinogana  | 1:20                             | 1:160  | 1:160  | 1:20       | 1:80   | 0       |
| 44              | Darien   | Pinogana  | 1:80                             | 1:80   | 1:640  | 1:20       | 1:80   | 1:80    |
| 45              | Darien   | Pinogana  | 0                                | 1:160  | 1:40   | 0          | 1:40   | 0       |
| 46              | Darien   | Pinogana  | 1:80                             | 1:160  | 1:320  | 1:80       | 1:320  | 1:320   |
| 47              | Cocle    | Cocle     | 0                                | 0      | 0      | 1:320      | 1:320  | 1:10240 |
| 48              | Darien   | Pinogana  | 0                                | 0      | 1:1280 | 1:80       | 1:320  | 1:80    |
| 49              | Darien   | Pinogana  | 1:40                             | 1:80   | 1:160  | 1:20       | 1:160  | 1:20    |
| 50              | Panama   | Capira    | 0                                | 1:160  | 1:20   | 0          | 0      | 0       |
| 51              | Panama   | Capira    | 0                                | 1:160  | 0      | 1:40       | 1:640  | 1:80    |
| 52              | Panama   | Chepo     | 1:640                            | 0      | 1:2560 | 1:40       | 1:160  | 1:40    |
| 53              | Colon    | Colon     | 1:160                            | 1:2560 | 1:160  | 1:40       | 1:160  | 1:40    |
| 54              | Colon    | Colon     | 1:160                            | 1:5120 | 1:160  | 0          | 1:40   | 0       |
| 55              | Darien   | Chepigana | 1:40                             | 1:80   | 1:80   | 0          | 1:40   | 0       |
| 56              | Darien   | Chepigana | 0                                | 0      | 0      | 0          | 1:40   | 0       |
| 57              | Darien   | Chepigana | 1:640                            | 1:1280 | 1:1280 | 0          | 1:40   | 0       |
| 58              | Darien   | Chepigana | 1:320                            | 1:2560 | 1:640  | 0          | 1:40   | 0       |
| 59              | Darien   | Chepigana | 0                                | 1:160  | 1:20   | 0          | 0      | 0       |
| 60              | Darien   | Pinogana  | 0                                | 1:160  | 1:20   | 0          | 1:40   | 0       |

|     |        |               |       |         |         |       |       |       |
|-----|--------|---------------|-------|---------|---------|-------|-------|-------|
| 61  | Darien | Pinogana      | 1:20  | 1:40    | 1:40    | 1:80  | 1:160 | 0     |
| 62  | Darien | Chepigana     | 0     | 0       | 1:320   | 0     | 1:40  | 0     |
| 63  | Panama | Chepo         | 0     | 1:160   | 1:20    | 1:40  | 1:80  | 1:80  |
| 64  | Darien | Pinogana      | 1:40  | 1:80    | 1:160   | 1:80  | 1:160 | 1:160 |
| 65  | Panama | Chepo         | 0     | 0       | 0       | 0     | 1:80  | 1:160 |
| 66  | Darien | Chepigana     | 1:40  | 1:640   | 1:80    | 1:80  | 1:160 | 1:160 |
| 67  | Darien | Chepigana     | 0     | 1:320   | 0       | 0     | 1:40  | 0     |
| 68  | Panama | Chepo         | 0     | 0       | 1:40    | 0     | 0     | 0     |
| 69  | Panama | Chepo         | 0     | 1:320   | 0       | 0     | 1:80  | 0     |
| 70  | Panama | Panama        | 0     | 1:80    | 0       | 0     | 1:40  | 1:320 |
| 71  | Panama | Panama        | 0     | 1:80    | 0       | 0     | 0     | 0     |
| 72  | Panama | Chepo         | 0     | 1:80    | 1:40    | 1:40  | 1:160 | 1:160 |
| 73  | Panama | Chepo         | 0     | 1:320   | 1:160   | 1:40  | 1:160 | 1:160 |
| 74  | Panama | Chepo         | 0     | 0       | 0       | 1:80  | 1:80  | 1:640 |
| 75  | Panama | Chepo         | 0     | 0       | 0       | 1:160 | 1:160 | 1:160 |
| 76  | Panama | Chepo         | 1:40  | 1:40    | ≥1:1280 | 0     | 0     | 0     |
| 77  | Panama | Chepo         | 0     | 0       | 1:80    | 0     | 0     | 0     |
| 78  | Panama | Chepo         | 1:40  | 1:160   | 1:20    | 1:80  | 1:80  | 1:80  |
| 79  | Panama | San Miguelito | 0     | 1:160   | 0       | 0     | 1:40  | 0     |
| 80  | Darien | Chepigana     | 1:40  | 1:80    | 1:160   | 0     | 1:40  | 0     |
| 81  | Darien | Chepigana     | 1:40  | 1:640   | 1:40    | 0     | 0     | 0     |
| 82  | Darien | Chepigana     | 1:80  | 1:160   | 1:640   | 0     | 1:40  | 0     |
| 83  | Darien | Chepigana     | 0     | 1:320   | 0       | 0     | 0     | 0     |
| 84  | Darien | Chepigana     | 0     | 0       | 0       | 1:40  | 1:40  | 0     |
| 85  | Darien | Chepigana     | 0     | 1:40    | 0       | 0     | 1:40  | 0     |
| 86  | Darien | Chepigana     | 0     | 1:40    | 0       | 0     | 1:80  | 0     |
| 87  | Darien | Chepigana     | 0     | 0       | 0       | 0     | 0     | 0     |
| 88  | Darien | Chepigana     | 0     | 0       | 0       | 1:80  | 1:160 | 1:80  |
| 89  | Darien | Chepigana     | 0     | 0       | 1:40    | 0     | 0     | 0     |
| 90  | Darien | Chepigana     | 0     | 0       | 1:20    | 0     | 0     | 0     |
| 91  | Darien | Chepigana     | 0     | 0       | 0       | 0     | 0     | 0     |
| 92  | Darien | Chepigana     | 0     | 0       | 1:80    | 0     | 1:40  | 0     |
| 93  | Darien | Chepigana     | 0     | 0       | 0       | 0     | 0     | 0     |
| 94  | Darien | Pinogana      | 0     | 0       | 1:160   | 1:640 | 1:640 | 1:640 |
| 95  | Darien | Pinogana      | 1:40  | 1:80    | 1:160   | 1:40  | 1:160 | 1:80  |
| 96  | Darien | Pinogana      | 1:80  | 1:640   | 1:640   | 0     | 0     | 0     |
| 97  | Darien | Pinogana      | 1:40  | 1:320   | 1:80    | 1:320 | 1:640 | 1:640 |
| 98  | Darien | Pinogana      | 1:320 | ≥1:1280 | 1:640   | 0     | 0     | 0     |
| 99  | Darien | Pinogana      | 1:40  | 1:320   | 1:80    | 1:80  | 1:320 | 1:80  |
| 100 | Darien | Pinogana      | 1:40  | 1:40    | 1:40    | 1:40  | 1:160 | 1:40  |
| 101 | Darien | Pinogana      | 1:160 | 1:320   | 1:320   | 1:40  | 1:320 | 1:80  |
| 102 | Darien | Pinogana      | 1:160 | 1:320   | 1:320   | 1:40  | 1:320 | 1:80  |
| 103 | Darien | Pinogana      | 1:320 | ≥1:1280 | 1:640   | 0     | 1:40  | 0     |
| 104 | Darien | Chepigana     | 0     | 1:160   | 1:40    | 0     | 1:40  | 0     |
| 105 | Darien | Chepigana     | 1:40  | 1:160   | 1:160   | 0     | 0     | 0     |
| 106 | Darien | Chepigana     | 0     | 0       | 0       | 0     | 1:40  | 0     |
| 107 | Darien | Chepigana     | 0     | 0       | 0       | 0     | 1:80  | 0     |
| 108 | Darien | Pinogana      | 1:20  | 1:160   | 1:80    | 1:320 | 1:320 | 1:320 |
| 109 | Darien | Pinogana      | 0     | 1:40    | 1:160   | 1:40  | 1:320 | 1:160 |
| 110 | Darien | Chepigana     | 0     | 0       | 0       | 0     | 0     | 0     |
| 111 | Darien | Pinogana      | 0     | 1:80    | 0       | 1:40  | 1:160 | 1:80  |
| 112 | Darien | Pinogana      | 0     | 0       | 0       | 0     | 0     | 0     |
| 113 | Darien | Pinogana      | 0     | 1:160   | 1:40    | 0     | 0     | 0     |
| 114 | Darien | Chepigana     | 0     | 0       | 0       | 1:20  | 1:80  | 1:20  |
| 115 | Darien | Chepigana     | 0     | 0       | 0       | 0     | 0     | 0     |
| 116 | Darien | Chepigana     | 1:160 | 1:20    | ≥1:1280 | 0     | 0     | 0     |
| 117 | Darien | Chepigana     | 0     | 1:40    | 1:80    | 1:40  | 1:80  | 1:80  |
| 118 | Darien | Chepigana     | 1:20  | 1:80    | 1:80    | 1:80  | 1:640 | 1:320 |
| 119 | Darien | Chepigana     | 1:20  | 1:80    | 1:80    | 1:40  | 1:160 | 1:80  |
| 120 | Darien | Pinogana      | 1:40  | 1:160   | 1:160   | 1:160 | 1:640 | 1:640 |
| 121 | Darien | Pinogana      | 0     | 1:40    | 0       | 1:40  | 1:160 | 1:160 |
| 122 | Darien | Pinogana      | 1:40  | 1:40    | 1:160   | 1:160 | 1:160 | 1:160 |
| 123 | Darien | Pinogana      | 1:80  | 1:160   | 1:640   | 1:320 | 1:640 | 1:640 |
| 124 | Darien | Chepigana     | 0     | 0       | 1:80    | 1:20  | 1:80  | 1:20  |
| 125 | Darien | Chepigana     | 0     | 0       | 0       | 1:40  | 1:320 | 1:40  |
| 126 | Darien | Chepigana     | 1:40  | 1:640   | 1:40    | 1:40  | 1:160 | 1:40  |
| 127 | Darien | Pinogana      | 1:80  | 1:640   | 1:160   | 1:160 | 1:320 | 1:320 |

|     |        |           |       |         |        |       |        |        |
|-----|--------|-----------|-------|---------|--------|-------|--------|--------|
| 128 | Darien | Pinogana  | 1:80  | 1:640   | 1:80   | 1:160 | 1:320  | 1:320  |
| 129 | Darien | Pinogana  | 1:40  | 1:320   | 1:80   | 1:640 | 1:1280 | 1:1280 |
| 130 | Darien | Pinogana  | 1:160 | 1:320   | 1:640  | 1:80  | 1:320  | 1:80   |
| 131 | Darien | Pinogana  | 0     | 1:80    | 1:80   | 0     | 1:80   | 0      |
| 132 | Darien | Pinogana  | 1:160 | ≥1:1280 | 1:160  | 1:40  | 1:160  | 1:40   |
| 133 | Darien | Pinogana  | 0     | 1:320   | 0      | 0     | 1:40   | 0      |
| 134 | Darien | Pinogana  | 0     | 1:320   | 1:80   | 1:80  | 1:320  | 1:160  |
| 135 | Darien | Pinogana  | 1:40  | 1:80    | 1:160  | 1:80  | 1:160  | 1:80   |
| 136 | Darien | Pinogana  | 1:40  | 1:80    | 1:80   | 1:320 | 1:640  | 1:320  |
| 137 | Darien | Pinogana  | 1:20  | 1:320   | 1:320  | 1:40  | 1:160  | 1:40   |
| 138 | Darien | Pinogana  | 1:20  | 1:80    | 1:80   | 1:80  | 1:160  | 1:40   |
| 139 | Darien | Pinogana  | 1:40  | 1:80    | 1:80   | 1:40  | 1:320  | 1:80   |
| 140 | Darien | Pinogana  | 0     | 1:80    | 1:320  | 1:80  | 1:640  | 1:80   |
| 141 | Darien | Pinogana  | 1:20  | 1:160   | 1:160  | 1:160 | 1:320  | 1:80   |
| 142 | Darien | Pinogana  | 1:40  | 1:80    | 1:40   | 1:20  | 1:40   | 1:20   |
| 143 | Darien | Pinogana  | 1:80  | 1:2560  | 1:160  | 1:80  | 1:160  | 1:80   |
| 144 | Darien | Pinogana  | 1:320 | 1:1280  | 1:1280 | 1:80  | 1:320  | 1:80   |
| 145 | Darien | Pinogana  | 1:80  | 1:160   | 1:160  | 1:80  | 1:160  | 1:160  |
| 146 | Darien | Pinogana  | 0     | 1:80    | 1:40   | 1:40  | 1:160  | 1:160  |
| 147 | Darien | Pinogana  | 0     | 1:40    | 1:40   | 0     | 1:40   | 0      |
| 148 | Darien | Pinogana  | 0     | 1:80    | 0      | 1:80  | 1:320  | 1:80   |
| 149 | Darien | Pinogana  | 0     | 1:80    | 0      | 1:40  | 1:80   | 1:40   |
| 150 | Darien | Pinogana  | 1:80  | 1:320   | 1:80   | 0     | 1:80   | 0      |
| 151 | Darien | Pinogana  | 1:80  | 1:160   | 1:1280 | 1:80  | 1:160  | 1:80   |
| 152 | Darien | pinogana  | 1:20  | 1:320   | 1:40   | 1:40  | 1:80   | 1:40   |
| 153 | Darien | Pinogana  | 0     | 1:320   | 0      | 1:40  | 1:160  | 1:40   |
| 154 | Darien | Chepigana | 0     | 1:160   | 1:160  | 1:80  | 1:320  | 1:80   |
| 155 | Darien | Chepigana | 1:160 | 1:160   | 1:640  | 1:80  | 1:80   | 1:80   |
| 156 | Darien | Chepigana | 1:20  | 1:320   | 1:80   | 1:40  | 1:160  | 1:160  |
| 157 | Darien | Chepigana | 1:80  | 1:160   | 1:80   | 1:40  | 1:40   | 1:40   |
| 158 | Darien | Chepigana | 1:80  | 1:160   | 1:640  | 1:320 | 1:640  | 1:320  |
| 159 | Darien | Chepigana | 1:160 | 1:640   | 1:640  | 1:80  | 1:80   | 1:40   |
| 160 | Darien | Chepigana | 1:40  | 1:40    | 1:320  | 1:160 | 1:320  | 1:320  |
| 161 | Darien | Chepigana | 1:20  | 1:40    | 1:40   | 0     | 1:40   | 0      |
| 162 | Darien | Chepigana | 0     | 1:80    | 1:80   | 0     | 1:40   | 0      |
| 163 | Darien | Chepigana | 1:160 | 1:1280  | 1:320  | 1:80  | 1:640  | 1:160  |
| 164 | Darien | Chepigana | 0     | 1:80    | 1:160  | 1:160 | 1:320  | 1:160  |
| 165 | Darien | Chepigana | 0     | 1:20    | 1:80   | 1:40  | 1:320  | 1:80   |
| 166 | Darien | Chepigana | 0     | 1:320   | 1:40   | 1:80  | 1:80   | 1:40   |
| 167 | Darien | Chepigana | 1:80  | 1:80    | 1:160  | 1:160 | 1:320  | 1:160  |
| 168 | Darien | Chepigana | 1:80  | 1:160   | 1:160  | 1:40  | 1:40   | 1:40   |
| 169 | Darien | Chepigana | 1:160 | 1:640   | 1:640  | 1:40  | 1:40   | 1:40   |
| 170 | Darien | Chepigana | 0     | 1:80    | 1:320  | 1:80  | 1:320  | 1:80   |
| 171 | Darien | Chepigana | 1:80  | 1:320   | 1:320  | 1:80  | 1:320  | 1:80   |
| 172 | Darien | Chepigana | 0     | 0       | 0      | 1:160 | 1:320  | 1:80   |
| 173 | Darien | Chepigana | 0     | 0       | 1:160  | 0     | 0      | 0      |
| 174 | Darien | Chepigana | 0     | 0       | 0      | 1:80  | 1:160  | 1:160  |
| 175 | Darien | Chepigana | 1:160 | 1:320   | 1:320  | 0     | 1:80   | 1:20   |
| 176 | Darien | Chepigana | 0     | 1:160   | 1:40   | 0     | 1:80   | 1:20   |
| 177 | Darien | Chepigana | 0     | 1:20    | 1:320  | 1:80  | 1:160  | 1:160  |
| 178 | Darien | Chepigana | 0     | 0       | 1:40   | 0     | 1:40   | 0      |
| 179 | Darien | Chepigana | 1:40  | 1:1280  | 1:80   | 1:80  | 1:160  | 1:80   |
| 180 | Darien | Chepigana | 0     | 0       | 1:160  | 0     | 0      | 0      |
| 181 | Darien | Chepigana | 1:80  | 1:320   | 1:640  | 1:40  | 1:80   | 1:40   |
| 182 | Darien | Chepigana | 1:20  | 1:20    | 1:160  | 1:160 | 1:320  | 1:80   |
| 183 | Darien | Chepigana | 1:40  | 1:80    | 1:320  | 1:40  | 1:80   | 1:160  |
| 184 | Darien | Chepigana | 1:40  | 1:80    | 1:320  | 1:80  | 1:320  | 1:160  |
| 185 | Darien | Chepigana | 1:80  | 1:320   | 1:320  | 1:80  | 1:320  | 1:80   |
| 186 | Darien | Chepigana | 1:40  | 1:80    | 1:320  | 1:40  | 1:160  | 1:80   |
| 187 | Darien | Chepigana | 0     | 0       | 0      | 0     | 0      | 0      |
| 188 | Darien | Chepigana | 1:80  | 1:1280  | 1:1280 | 1:20  | 1:40   | 1:80   |
| 189 | Darien | Chepigana | 0     | 1:160   | 1:40   | 1:80  | 1:640  | 1:160  |
| 190 | Darien | Chepigana | 0     | 1:80    | 1:80   | 0     | 1:160  | 1:40   |
| 191 | Darien | Chepigana | 0     | 0       | 1:80   | 0     | 1:80   | 1:20   |
| 192 | Darien | Chepigana | 1:80  | 1:160   | 1:40   | 1:40  | 1:40   | 1:40   |
| 193 | Darien | Chepigana | 0     | 1:40    | 1:40   | 0     | 1:40   | 0      |
| 194 | Darien | Chepigana | 0     | 0       | 1:80   | 1:40  | 1:160  | 1:80   |
